# Supplementary material
Source: HighWire-hosted journal article supplement (https://hw-f5-jim.highwire.org/content/jim-2021-002314)
Supplement: inline-supplementary-material-2 [file inline-supplementary-material-2.pdf]

Supplementary Table 1. Correlation analysis of different parameters with Gensini score.

|       | r      | p value |
|-------|--------|---------|
| MHR   | 0.210  | <0.001  |
| NHR   | 0.208  | <0.001  |
| LHR   | 0.032  | 0.103   |
| HDL-C | -0.152 | <0.001  |

HDL-C: high-density lipoprotein cholesterol, LHR: lymphocyte to high-density lipoprotein cholesterol ratio, MHR: monocyte to high-density lipoprotein cholesterol ratio, NHR: neutrophil to high-density lipoprotein cholesterol ratio.

Supplementary Table 2. Logistic regression analysis of the relationship between different parameters and the severe stenosis in patients diagnosed with CAD.

|                       | Severe stenosis         |                      |                         |                      |
|-----------------------|-------------------------|----------------------|-------------------------|----------------------|
|                       | OR(95% CI) <sup>a</sup> | p value <sup>a</sup> | OR(95% CI) <sup>b</sup> | p value <sup>b</sup> |
| Univariate analysis   |                         |                      |                         |                      |
| MHR                   | 2.41(1.67-3.47)         | <0.001               | 2.59(1.78-3.76)         | <0.001               |
| NHR                   | 1.06(1.04-1.09)         | <0.001               | 1.06(1.04-1.09)         | <0.001               |
| LHR                   | 1.06(0.97-1.16)         | 0.173                | 1.04(0.95-1.14)         | 0.395                |
| HDL-C                 | 0.41(0.29-0.59)         | <0.001               | 0.47(0.33-0.69)         | <0.001               |
| Multivariate analysis |                         |                      |                         |                      |
| MHR                   | 1.71(1.15-2.55)         | 0.009                | 2.10(1.40-3.16)         | <0.001               |
| NHR                   | 1.05(1.02-1.08)         | 0.002                | 1.05(1.02-1.08)         | 0.001                |
| LHR                   | 1.01(0.91-1.11)         | 0.924                | 0.99(0.89-1.10)         | 0.859                |
| HDL-C                 | 0.45(0.30-0.68)         | <0.001               | 0.51(0.34-0.78)         | 0.002                |

Adjusted for age, sex, smoking, hypertension, ALT, HbA1c, TG, LDL-C, CK-MB and uric acid.

OR(95% CI)<sup>a</sup> and OR(95% CI)<sup>b</sup>: A Gensini score in the highest tertile was defined as severe stenosis in all the chest pain patients and those diagnosed with CAD, respectively.

ALT: alanine transaminase, CAD: coronary artery disease, CK-MB: creatine kinase isoenzymes MB, HbA1c: glycated hemoglobin A1c, HDL-C: high-density lipoprotein cholesterol, LDL-C: low-density lipoprotein cholesterol, LHR: lymphocyte to high-density lipoprotein cholesterol ratio, MHR: monocyte to high-density lipoprotein cholesterol ratio, NHR: neutrophil to high-density lipoprotein cholesterol ratio, TG: triglyceride.

Supplementary Table 3. Receiver operating characteristic curve analysis of the different parameters for the predictive value of CAD and severe stenosis in chest patients with LDL-C<1.8mmol/L.

|                          | AUC (95%CI)     | p value | Sensitivity (%) | Specificity (%) | z test         |
|--------------------------|-----------------|---------|-----------------|-----------------|----------------|
| <b>CAD</b>               |                 |         |                 |                 |                |
| Traditional risk factors | 0.60(0.58-0.63) | <0.001  | 68.3            | 46.6            |                |
| +MHR                     | 0.65(0.62-0.67) | <0.001  | 48.3            | 73.5            | z=4.49 p<0.001 |
| +NHR                     | 0.65(0.63-0.67) | <0.001  | 44.1            | 77.5            | z=4.94 p<0.001 |
| +HDL-C                   | 0.63(0.61-0.66) | <0.001  | 54.7            | 65.3            | z=3.68 p<0.001 |
| <b>Severe stenosis</b>   |                 |         |                 |                 |                |
| Traditional risk factors | 0.61(0.59-0.63) | <0.001  | 41.4            | 75.8            |                |
| +MHR                     | 0.63(0.61-0.65) | <0.001  | 57.1            | 63.3            | z=3.50 p<0.001 |
| +NHR                     | 0.64(0.62-0.66) | <0.001  | 61.2            | 59.6            | z=4.06 p<0.001 |
| +HDL-C                   | 0.64(0.62-0.66) | <0.001  | 70.0            | 52.0            | z=4.55 p<0.001 |

AUC: area under the curve, CAD: coronary artery disease MHR: monocyte to high-density lipoprotein cholesterol ratio, NHR: neutrophil to high-density lipoprotein cholesterol ratio.

+MHR: Traditional risk factors combined with MHR, +NHR: Traditional risk factors combined with NHR, +HDL-C: Traditional risk factors combined with HDL-C.

Traditional risk factors includes age, hypertension, HbA<sub>1c</sub>, TG, LDL-C.
